# Supplementary material
Source: PubMed Central journal article supplement (PMC6382580)
Supplement: NIHMS1517960-supplement-1.pdf [file NIHMS1517960-supplement-1.pdf]

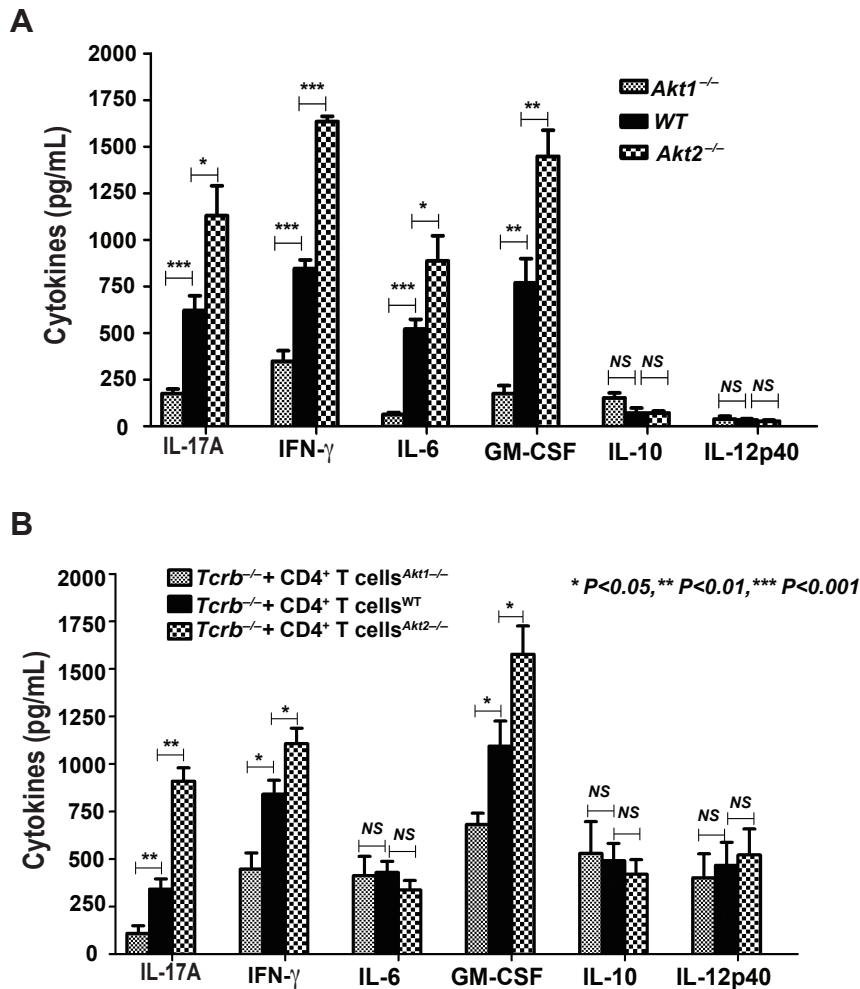

**Supplemental Figure 1. *Akt1*<sup>-/-</sup> and *Akt2*<sup>-/-</sup> T cells display an opposing capacity in producing IL-17, IFN- $\gamma$ , and GM-CSF, but not IL-10, IL-6, and IL-12p40**

(A) WT, *Akt1*<sup>-/-</sup> and *Akt2*<sup>-/-</sup> mice (n = 8) were immunized with MOG<sub>35-55</sub> in CFA and 8 days later the mice were sacrificed. The draining lymph node cells were cultured with MOG<sub>35-55</sub> peptide (20  $\mu$ g/ml) for 72 h. The supernatants collected from these cultures were subjected to ELISA for IL-17, IFN- $\gamma$ , IL-6, and GM-CSF, IL-10 and IL12p40. (B) *Tcrb*<sup>-/-</sup> mice receiving WT, *Akt1*<sup>-/-</sup> or *Akt2*<sup>-/-</sup> CD4<sup>+</sup> T cells (n = 5) were immunized with MOG<sub>35-55</sub> in CFA. The recipient mice were sacrificed at day 10. The draining lymph node cells were cultured with MOG<sub>35-55</sub> peptide (20  $\mu$ g/ml) for 72 h. The supernatants collected from these cultures were subjected to ELISA for IL-17, IFN- $\gamma$ , IL-6, and GM-CSF, IL-10 and IL12p40. The data shown are one representative of three independent experiments. Student t test. \* p<0.05, \*\* p<0.01, \*\*\* p<0.001

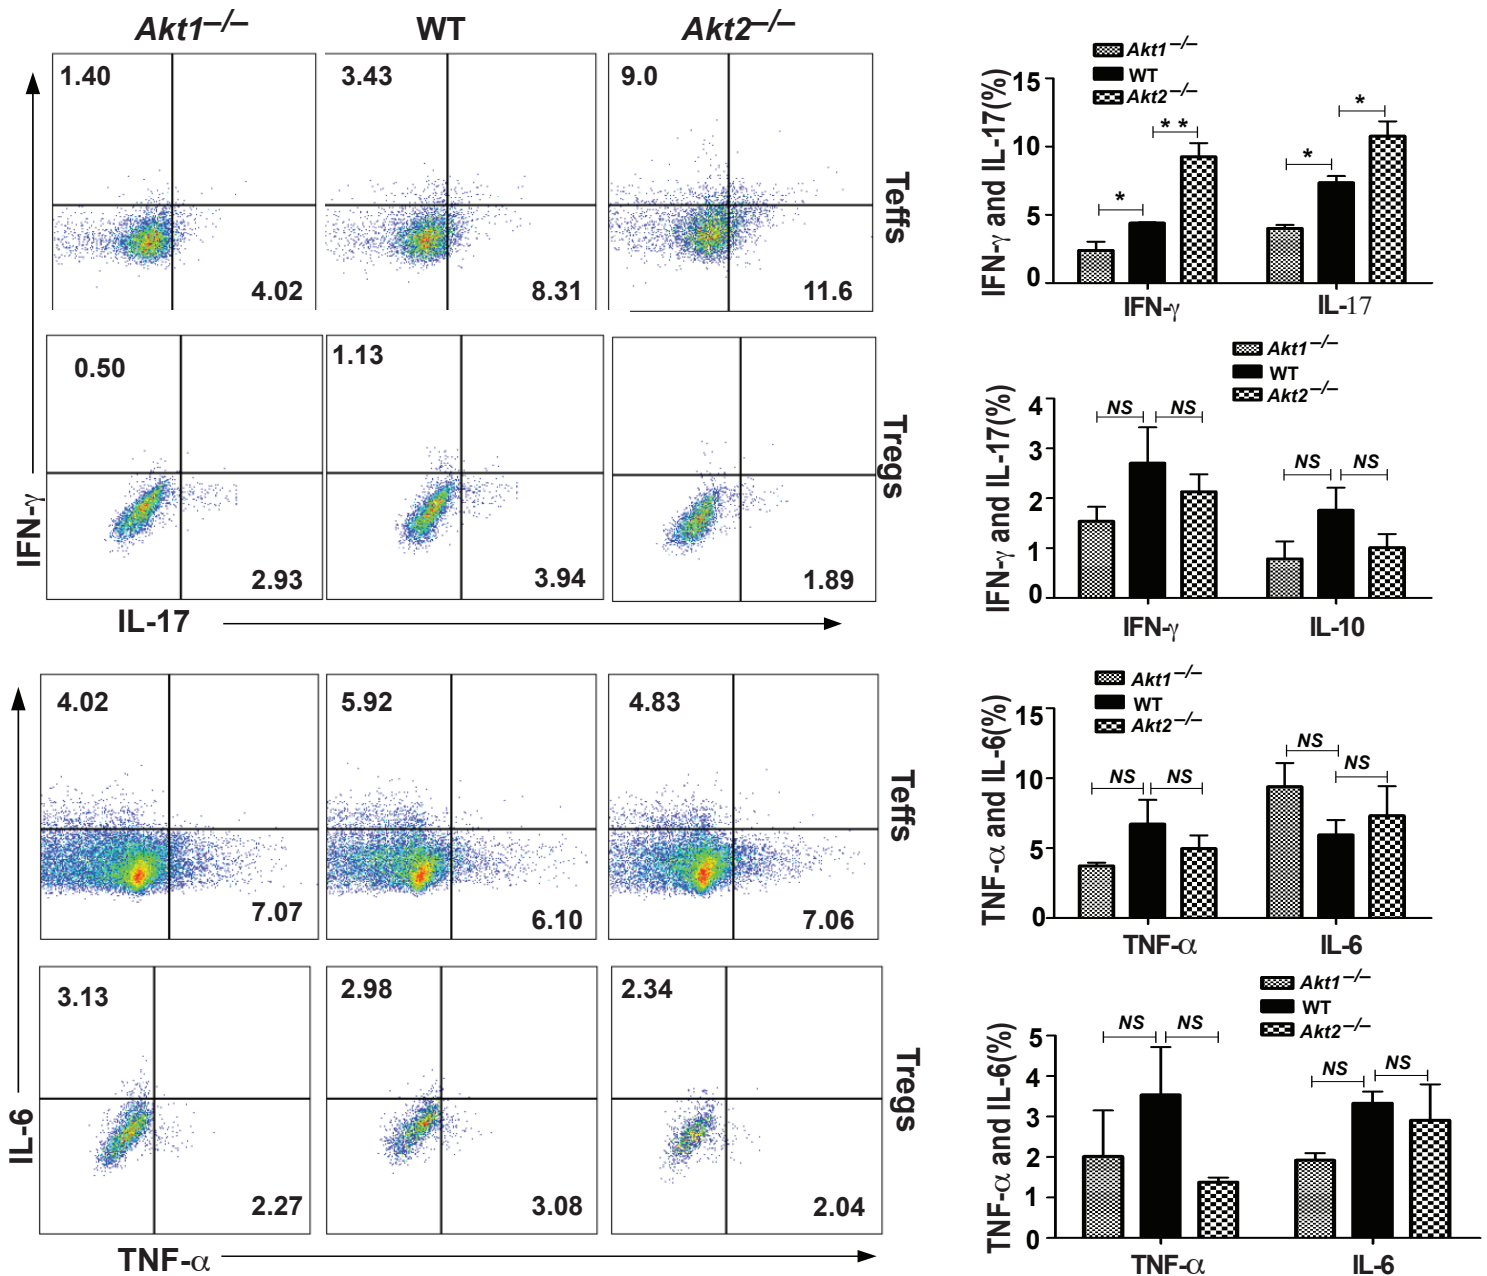

**Supplemental Figure 2. The major T cells that contribute to inflammatory cytokines by *Akt1*<sup>-/-</sup>, and *Akt2*<sup>-/-</sup> mice during EAE induction are Teffs and not Tregs**

WT, *Akt1*<sup>-/-</sup>, and *Akt2*<sup>-/-</sup> mice (n= 4) were immunized with MOG<sub>35-55</sub> in CFA and 8 days later the mice were sacrificed. The draining lymph node cells stimulated with PMA/ionomycin, surface-stained with anti-CD4, anti-CD25, and intracellularly stained with anti-Foxp3 Ab, together with anti-IL-17, anti-IFN- $\gamma$ , anti-IL-6, and anti-TNF- $\alpha$  Abs, respectively. The expression of these cytokines in CD4<sup>+</sup>CD25<sup>+</sup>Foxp3<sup>+</sup> Tregs and CD4<sup>+</sup>Foxp3<sup>-</sup> Teffs as determined by flow cytometry.

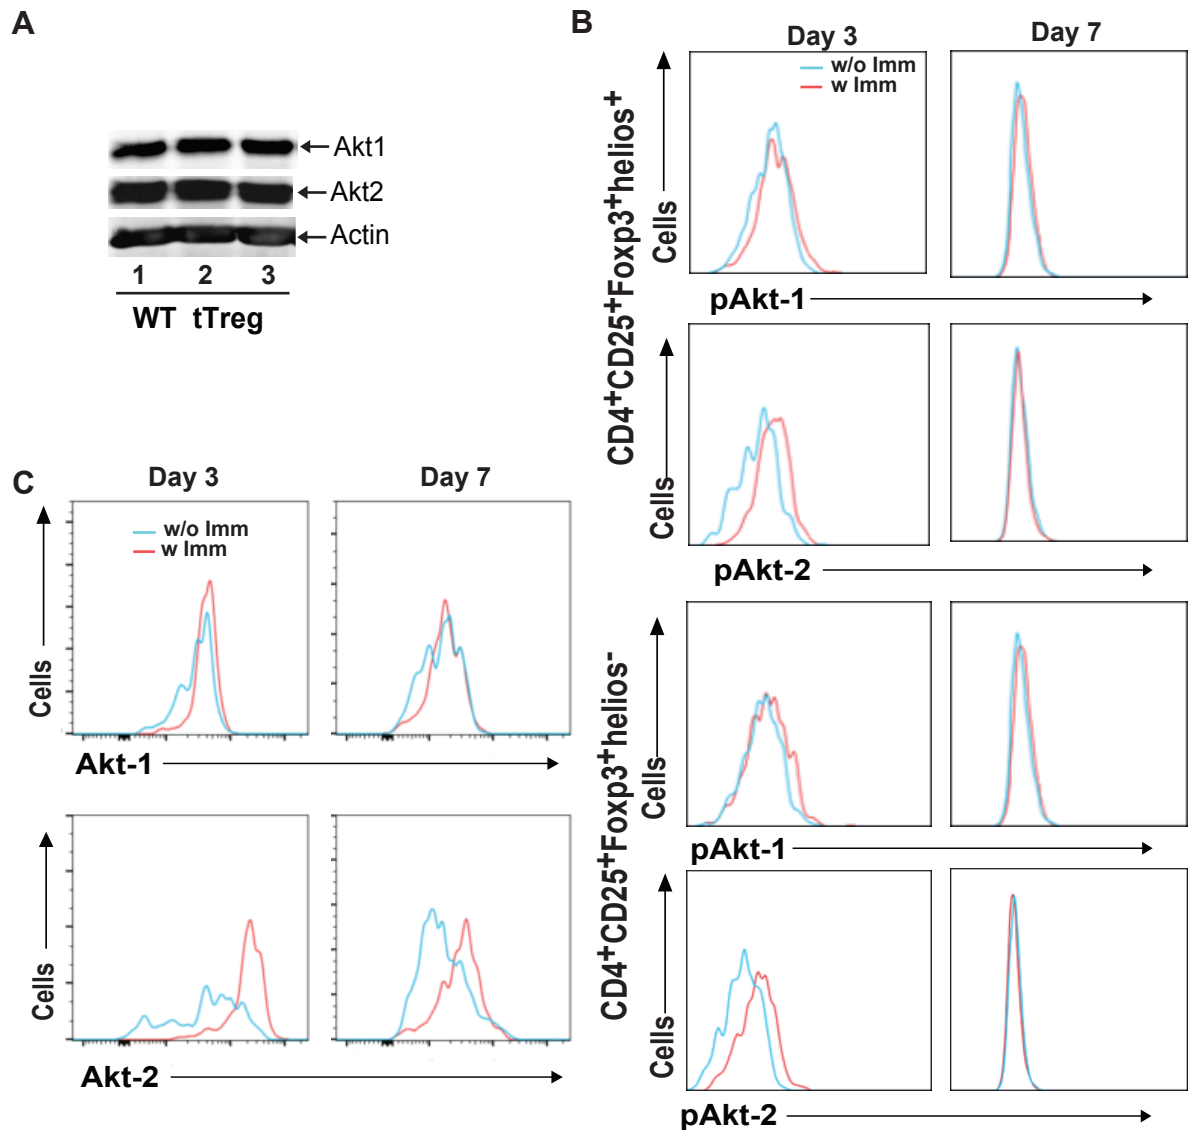

**Supplemental Figure 3. Activated Akt-1 and Akt-2, as well as total Akt-1 and Akt-2 are differentially expressed in CD4<sup>+</sup>CD25<sup>+</sup>Foxp3<sup>+</sup> Tregs upon immunization with MOG<sub>35-55</sub> in CFA.** (A) Tregs were isolated from thymuses of WT mice (n = 3) at the steady state, and the expressions of Akt-1 and Akt-2 in these Tregs were assessed by immunoblotting. (B) WT mice (n = 3) immunized with MOG<sub>35-55</sub> in CFA were sacrificed on day 3 and 7 after immunization (w Imm). The cells in the draining lymph nodes were surface-stained with anti-CD4, anti-CD25, and intracellularly stained with anti-Foxp3 and anti-Helios, together with anti-phospho-Akt-1, and anti-phospho-Akt-2. (C) WT mice (n = 3) immunized with MOG<sub>35-55</sub> in CFA were sacrificed on day 3 and 7 after immunization (w Imm). The cells in the draining lymph nodes were surface-stained with anti-CD4 and anti-CD25, and intracellularly stained with anti-Foxp3, together with anti-Akt-1, or anti-Akt-2. WT mice without immunization (w/o imm) were used as controls. The data showed are one representative of three independent experiments.

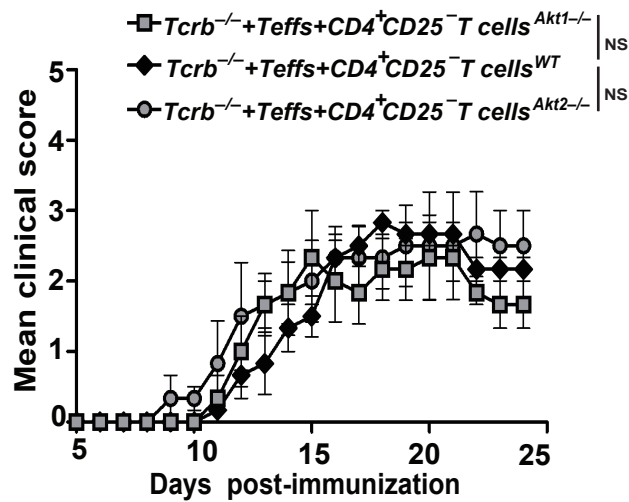

**Supplemental Figure 4.  $Akt1^{-/-}$  and  $Akt2^{-/-}$  Teffs do not suppress EAE development in  $Tcrb^{-/-}$  mice receiving naive  $CD4^{+}$  T cells**

Naïve  $CD4^{+}CD44^{low}CD62L^{hi}CD25^{-}$  T cells from WT mice together with  $CD4^{+}CD25^{-}$  T cells from WT,  $Akt1^{-/-}$ , or  $Akt2^{-/-}$  mice were transferred into  $Tcrb^{-/-}$  mice (n = 4 per group) which were then immunized with MOG<sub>35-55</sub> in CFA. The development of EAE was monitored. The data shown are one representative of two independent experiments.
